# Supplementary material for: Fabrication of stable and reversible DNA–RNA hammerhead ribozyme on a solid surface
Source: Royal Society of Chemistry journal article supplement (doi:10.1039/c4ra07170k), 2014-09-16
Supplement: c4ra07170k1.pdf [file c4ra07170k1.pdf]

## Supporting Information

### **Fabrication of Stable and Reversible DNA-RNA Hammerhead Ribozyme on a Solid Surface**

Zhaoyin Wang,<sup>a,b</sup> Zhenning Ren,<sup>b</sup> Fengzhen Liu,<sup>c</sup> Siyu Liu,<sup>a</sup> Zhaoxia Wang,<sup>\*c</sup> and Xiaoli Zhu<sup>\*a</sup>

## Supplemental Results

### 1. Effect of $Mg^{2+}$ ions concentration on the cleavage activity of surface-tethered HHRz.

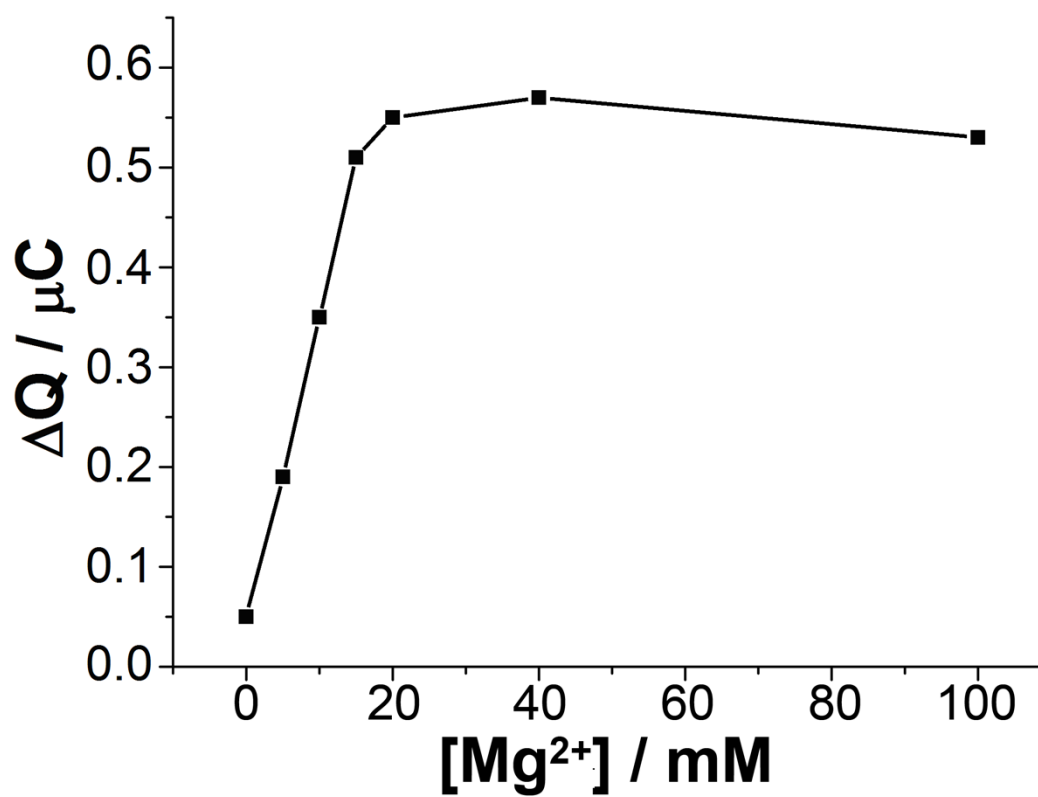

**Figure S1** Effect of  $Mg^{2+}$  ions concentration on the cleavage activity of surface-tethered HHRz.  $\Delta Q$  represents the charge changes caused by different concentration of  $Mg^{2+}$  ions. So, 20 mM is chosen as the optimal  $Mg^{2+}$  ions concentration for the subsequent experiments.

**2. Effect of complementary strand concentration on the construction of surface-tethered HHRz.**

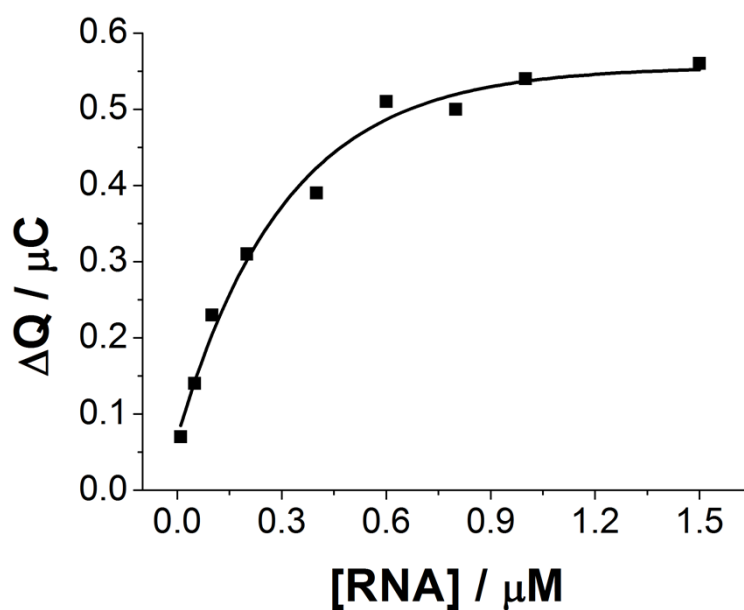

**Figure S2** Effect of complementary strand concentration on the construction of surface-tethered HHRz.  $\Delta Q$  represents the charge changes caused by different concentration of complementary strand. So, 1  $\mu\text{M}$  is chosen as the optimal complementary strand concentration for the subsequent experiments.
